# Supplementary material
Source: PubMed Central journal article supplement (PMC2820364)
Supplement: NIHMS174291-supplement-1.pdf [file NIHMS174291-supplement-1.pdf]

**Supplementary Figure 1: Inhibition of PI3K (WT and mutant) with LY294002**

Inhibition of purified PI3K enzyme activity by varying concentrations of LY294002

A: Graph shows decrease in activity of PI3K $\alpha$  WT (■) and PI3K $\alpha$  mutants H855E (▲) and Q859D (●) upon the addition of increasing concentrations of LY294002

B: Graph shows decrease in activity of PI3K $\beta$  WT (■) and PI3K $\beta$  mutants E858H (▲) and D862Q (●) upon the addition of increasing concentrations of LY294002

A.

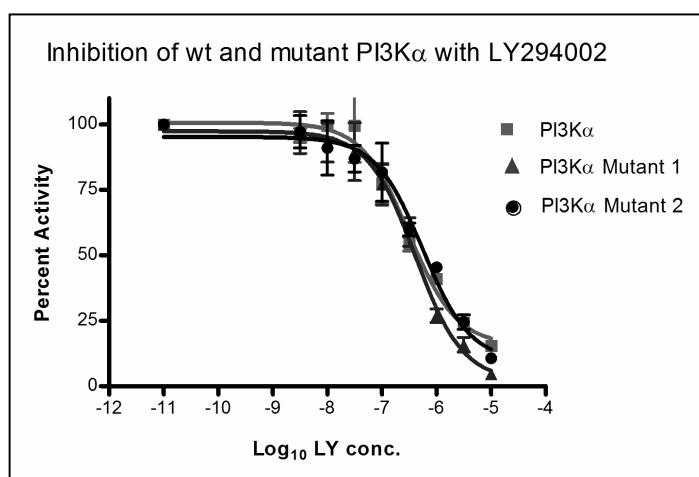

B.

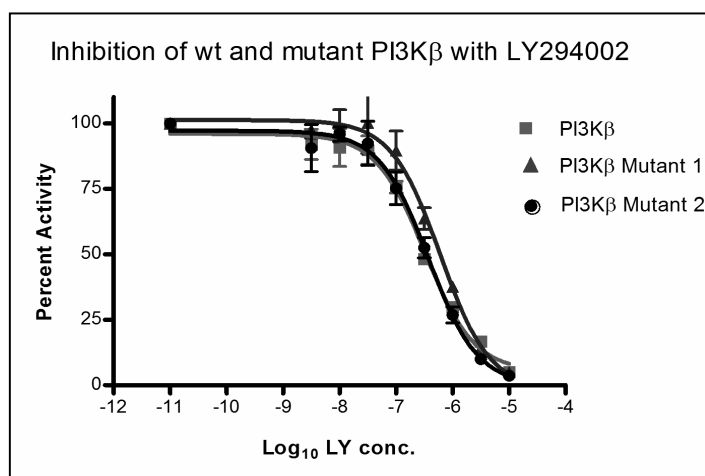

**Supplementary Table 1: Full IC50 data including error calculations (SD and SEM) for inhibition of WT and mutant PI3K isoforms.**

|          | PI3Kb (wt) |       |       | PI3Kb (D862Q) |       |       | PI3Kb (E858H) |       |       | PI3Ka (wt) |       |       | PI3Ka (Q861D) |       |       | PI3Ka (H857E) |       |       |
|----------|------------|-------|-------|---------------|-------|-------|---------------|-------|-------|------------|-------|-------|---------------|-------|-------|---------------|-------|-------|
|          | IC50       | SD    | SEM   | IC50          | SD    | SEM   | IC50          | SD    | SEM   | IC50       | SD    | SEM   | IC50          | SD    | SEM   | IC50          | SD    | SEM   |
| LY294002 | 0.339      | 0.020 | 0.012 | 0.623         | 0.136 | 0.079 | 0.361         | 0.057 | 0.033 | 0.465      | 0.158 | 0.091 | 0.405         | 0.134 | 0.077 | 0.628         | 0.188 | 0.108 |
| TGX221   | 0.029      | 0.018 | 0.011 | 0.032         | 0.012 | 0.007 | 0.009         | 0.002 | 0.001 | 0.771      | 0.044 | 0.026 | 0.861         | 0.158 | 0.091 | 1.388         | 0.379 | 0.219 |
| TGX286   | 0.007      | 0.004 | 0.002 | 0.017         | 0.008 | 0.005 | 0.013         | 0.002 | 0.001 | 0.995      | 0.169 | 0.098 | 2.171         | 0.915 | 0.528 | 1.335         | 0.161 | 0.093 |
| TGX102   | 0.178      | 0.039 | 0.022 | 0.198         | 0.034 | 0.020 | 0.134         | 0.031 | 0.018 | 0.767      | 0.228 | 0.132 | 2.511         | 0.381 | 0.220 | 2.327         | 0.081 | 0.047 |
| TGX132   | 2.505      | 0.491 | 0.284 | 1.127         | 0.316 | 0.183 | 1.159         | 0.087 | 0.050 | 0.841      | 0.246 | 0.142 | 5.171         | 1.826 | 1.054 | 4.123         | 2.386 | 1.378 |
| I        | 0.532      | 0.127 | 0.073 | 0.438         | 0.172 | 0.099 | 0.321         | 0.079 | 0.046 | 0.132      | 0.017 | 0.010 | 0.387         | 0.028 | 0.016 | 0.656         | 0.276 | 0.159 |
| III      | 0.830      | 0.253 | 0.146 | 0.681         | 0.095 | 0.055 | 0.206         | 0.070 | 0.040 | 0.223      | 0.023 | 0.013 | 0.664         | 0.292 | 0.169 | 0.640         | 0.167 | 0.097 |
| III      | 4.311      | 2.063 | 1.191 | 0.336         | 0.073 | 0.042 | 0.381         | 0.031 | 0.018 | 0.155      | 0.027 | 0.016 | 0.269         | 0.122 | 0.071 | 0.477         | 0.049 | 0.028 |
